# Supplementary material for: Metal and F dual-doping to synchronously improve electron transport rate and lifetime for TiO2 photoanode to enhance dye-sensitized solar cells performances
Source: Royal Society of Chemistry journal article supplement (doi:10.1039/c4ta07068b), 2015-01-01
Supplement: c4ta07068b1.pdf [file c4ta07068b1.pdf]

## **Metal and F Dual-doping to Synchronously Improve Electronic Transport Rate and Lifetime for TiO<sub>2</sub> Photoanode to Enhance Dye-Sensitized Solar Cells Performances**

Yandong Duan,<sup>‡ab</sup> Jiaxin Zheng,<sup>‡a</sup> Ming Xu,<sup>a</sup> Xiaohe Song,<sup>a</sup> Nianqing Fu,<sup>bc</sup> Yanyan Fang,<sup>b</sup> Xiaowen Zhou,<sup>b</sup> Yuan Lin<sup>\*ab</sup> and Feng Pan<sup>\*a</sup>

<sup>a</sup>School of Advanced Materials, Peking University Shenzhen Graduate School, Shenzhen 518055, China

<sup>b</sup>Beijing National Laboratory for Molecular Sciences, Key Laboratory of Photochemistry, Institute of Chemistry, Chinese Academy of Sciences, Beijing 100190, China

<sup>c</sup>Department of Applied Physics, The Hong Kong Polytechnic University, Hung Hom, Kowloon, Hong Kong, China

† Electronic supplementary information (ESI) available. See DOI:

‡ Y. D. Duan and J. X. Zheng contributed equally to this work.

---

\* Corresponding author: [linyuan@iccas.ac.cn](mailto:linyuan@iccas.ac.cn) Tel: 86-10-82615031 Fax: 86-10-82617315

\* Corresponding author: [panfeng@pkusz.edu.cn](mailto:panfeng@pkusz.edu.cn) Tel: 86-755-26033200

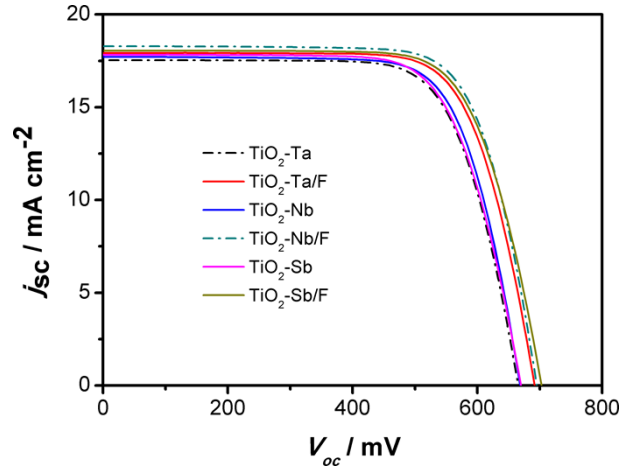

**Fig. S1** Photocurrent-voltage characteristics of DSSCs based on the doped  $\text{TiO}_2$  photoanodes under illumination AM1.5.  $(\text{C}_4\text{H}_9\text{O})_5\text{Ta}$ ,  $(\text{C}_4\text{H}_9\text{O})_5\text{Nb}$ , and  $(\text{CH}_3\text{CO}_2)_3\text{Sb}$  are tantalum butoxide, niobium butoxide, and antimony triacetate, respectively. The optimized molar ratios of Ta, Nb and Sb to Ti were 1:100. The molar ratio of F to Ti in  $\text{TiO}_2\text{-F}$ ,  $\text{TiO}_2\text{-Ta/F}$ ,  $\text{TiO}_2\text{-Nb/F}$ , and  $\text{TiO}_2\text{-Sb/F}$  samples was 0.75:100.

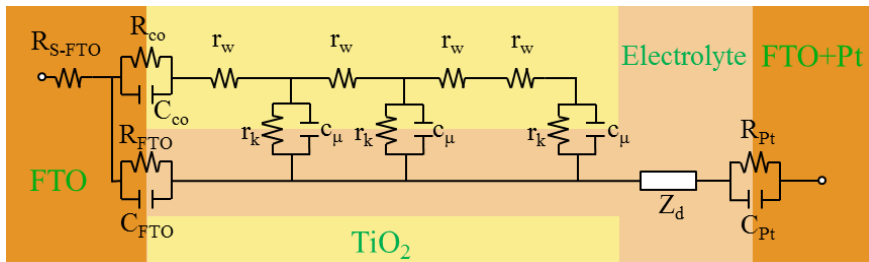

**Fig. S2** The general transmission line model of DSSCs.

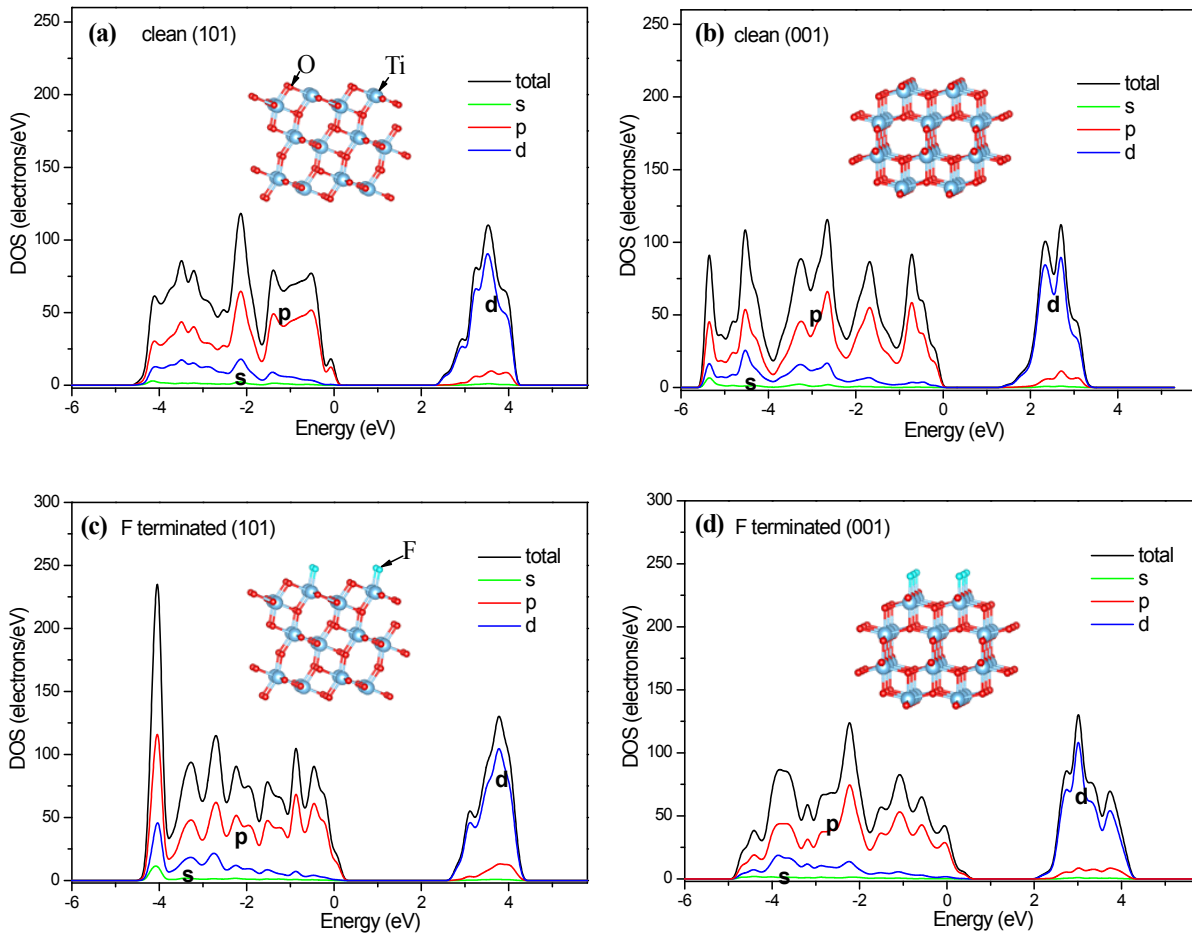

**Fig. S3** Calculated total and partial density of states (DOS) for surfaces of anatase. (a) clean (101); (b) clean (001); (c) F terminated (101); (d) F terminated (001). The insets are the clean surface and F adsorbed surface models for anatase.

**Table S1** Comparison of different doping element for TiO<sub>2</sub>/SnO<sub>2</sub>/ZnO and photovoltaic performance of the DSSCs based on these samples.

| Ref.                                             | Doping element                     | CB shift | Injection efficiency | Transport rate | Electron Lifetime | Dye loading | $\eta$ (%) <sup>a</sup> |
|--------------------------------------------------|------------------------------------|----------|----------------------|----------------|-------------------|-------------|-------------------------|
| DSSCs based on doped-TiO <sub>2</sub> photoanode |                                    |          |                      |                |                   |             |                         |
| 1                                                | W <sup>6+</sup>                    |          |                      | ↑              | ↓                 |             | 6.64/7.42               |
| 2                                                | W <sup>6+</sup>                    | positive |                      | ↓              | ↑                 |             | 3.37/4.2                |
| 3                                                | W <sup>6+</sup>                    |          |                      | ↑              | ↑                 | ↑           | 4.14/8.71               |
| 4                                                | Zn <sup>2+</sup>                   |          |                      | ↑              |                   | ↑           | 5.18/5.73               |
| 5                                                | Mg <sup>2+</sup>                   | positive | ↑                    | ↑              |                   | →           | 6.35/7.12               |
| 6                                                | Mg <sup>2+</sup>                   | negative |                      | ↑              | ↓                 |             | ---                     |
| 7                                                | V <sup>5+</sup>                    |          |                      | ↑              | ↓                 | ↓           | 6.01/6.81               |
| 8                                                | Ce <sup>4+</sup> /Ce <sup>3+</sup> | positive | ↑                    |                |                   | →           | 6.4/7.12                |
| 9                                                | Sb <sup>3+</sup>                   | positive | ↑                    | ↑              |                   | →           | 7.36/8.13               |
| 10                                               | Ru <sup>3+</sup>                   |          |                      | ↑              |                   |             | 4.3/5.2                 |
| 11                                               | Ag <sup>+</sup>                    |          |                      | ↓              | ↑                 | ↑           | 4.74/6.13               |
| 12                                               | Zn <sup>2+</sup>                   | negative |                      | ↑              |                   |             | 6.7/7.6                 |
| 13                                               | Zn <sup>2+</sup>                   |          |                      |                | ↑                 |             | 0.58/4.63               |
| 14                                               | Zn <sup>2+</sup>                   | negative |                      | ↑              | ↓(1sun)           |             | 7.8/8.3                 |
|                                                  |                                    | negative |                      | ↑              | ↑(0.1sun)         |             | 6.2/7.6                 |
| 15                                               | Ta <sup>5+</sup>                   |          |                      |                | ↑                 |             | 4.8/6.7                 |
| 16                                               | Nb                                 |          |                      | ↓              | ↑                 |             | 2.40/3.21               |
| 17                                               | Nb                                 |          | ↑                    | ↑              | ↑                 |             | 6.8/8.0                 |
| 18                                               | Nb                                 | positive | ↑                    | ↑              |                   |             | 6.6/7.8                 |
| 19                                               | Nb                                 |          |                      | ↑              | ↑                 |             | ---                     |
| 20                                               | Nb <sup>5+</sup>                   |          | ↑                    |                | ↑                 | ↑           | 7.4/8.1                 |
| 21                                               | Eu <sup>3+</sup>                   | negative |                      |                | ↑                 |             | 2.60/3.43               |
| 22                                               | Cu <sup>2+</sup>                   | negative |                      |                | ↑                 |             | 5.8/8.1                 |
| 23                                               | Cr <sup>3+</sup>                   | negative |                      |                | ↑                 |             | 7.1/8.4                 |
| 24                                               | Zr <sup>4+</sup>                   | negative |                      |                |                   |             | 7.0/8.1                 |
| 25                                               | Ni                                 | negative |                      | ↑              | ↑                 | ↑           | 5.2/6.75                |
| 26                                               | Li <sup>+</sup>                    |          |                      |                | ↑                 |             | 1.96/2.60               |
| b                                                | Sn <sup>4+</sup> /F <sup>-</sup>   | negative |                      | ↑              | ↑                 | →           | 7.22/8.89               |
| b                                                | Ta <sup>5+</sup>                   | positive |                      | ↑              | ↓                 | →           | 7.22/8.3                |
| b                                                | Ta <sup>5+</sup> /F <sup>-</sup>   | positive |                      | ↑              | ↑                 | →           | 7.22/8.78               |
| b                                                | Nb <sup>5+</sup>                   | positive |                      | ↑              | ↓                 | →           | 7.22/8.4                |
| b                                                | Nb <sup>5+</sup> /F <sup>-</sup>   | positive |                      | ↑              | ↑                 | →           | 7.22/9.02               |
| b                                                | Sb <sup>3+</sup>                   | positive | ↑                    | ↑              | ↓                 | →           | 7.22/8.36               |
| b                                                | Sb <sup>3+</sup> /F <sup>-</sup>   | Positive |                      | ↑              | ↑                 | →           | 7.22/8.87               |
| b                                                | F <sup>-</sup>                     |          |                      | ↓              | ↑                 | →           | 7.22/8.31               |
| 25                                               | B <sup>3+</sup>                    | positive | ↑                    |                | ↑                 |             | 3.02/3.44               |
| 26                                               | S <sup>6+</sup>                    | positive | ↑                    | ↑              |                   |             | 5.56/6.91               |
| 27                                               | F <sup>-</sup>                     |          |                      | ↑              | ↑                 | →           | 5.62/6.31               |

|                                                  |                     |          |   |   |   |   |             |
|--------------------------------------------------|---------------------|----------|---|---|---|---|-------------|
| 28                                               | I <sup>-</sup>      |          |   |   | ↑ | ↑ | 4.9/7.0     |
| 29                                               | N                   |          | ↑ |   | ↓ |   | 7.14/8.32   |
| 30                                               | N                   |          |   |   |   | ↑ | 7/8         |
| 31                                               | Zr <sup>4+</sup> /N |          |   | ↑ | ↑ | ↑ | 9.6/12.62   |
| 32                                               | N/F <sup>-</sup>    | positive | ↑ | ↑ | ↑ |   | 6.71/8.20   |
| DSSCs based on doped-SnO <sub>2</sub> photoanode |                     |          |   |   |   |   |             |
| 33                                               | Sb <sup>3+</sup>    |          |   | ↑ |   |   | 2.8/3.5     |
| 34                                               | Mg <sup>2+</sup>    |          |   | ↑ | ↑ | ↑ | 0.85/2.03   |
| 35                                               | Zn <sup>2+</sup>    | negative |   |   | ↑ | ↑ | 1.13/4.15   |
| 36                                               | Zn <sup>2+</sup>    |          |   | ↑ |   |   | ---/3.00    |
| 37                                               | N                   | negative |   |   | ↑ | ↑ | 1.07/2.31   |
| DSSCs based on doped-ZnO photoanode              |                     |          |   |   |   |   |             |
| 38                                               | Eu <sup>3+</sup>    | positive | ↑ | ↑ | ↓ | ↑ | 4.5/5.7     |
| 39                                               | Mg <sup>2+</sup>    | negative |   | ↑ | ↑ |   | 1.97/4.11   |
| 40                                               | Al <sup>3+</sup>    |          | ↑ |   | ↑ |   | 0.205/0.298 |
| 41                                               | Sn <sup>4+</sup>    |          |   | ↑ |   | ↑ | 1.49/1.82   |
| 42                                               | B <sup>3+</sup>     |          |   |   | ↑ | ↑ | 4.1/7.2     |
| 43                                               | N <sup>3-</sup>     |          | ↑ |   | ↑ |   | 0.67/2.64   |
| 44                                               | N <sup>3-</sup>     |          |   |   |   | ↑ | 2.2/5.0     |
| 45                                               | I <sup>-</sup>      |          |   |   | ↑ |   | 2.3/4.5     |
| 46                                               | F <sup>-</sup>      |          |   |   | ↑ | ↑ | 1.04/3.43   |

<sup>a</sup>Photon-to-electron conversion efficiency of DSCs with pure TiO<sub>2</sub> and the doped TiO<sub>2</sub>.

<sup>b</sup>Data in our work.

<sup>c</sup> ↑ , increase; ↓ , decrease; → , no change.

**Table S2** Flat band potential ( $E_{fb}$ ) and donor density ( $N_d$ ) of TiO<sub>2</sub> and the doped TiO<sub>2</sub> films

| Samples                | $E_{fb}$ / V vs. SCE | $N_d$ ( $\times 10^{19}$ )/cm <sup>-3</sup> |
|------------------------|----------------------|---------------------------------------------|
| TiO <sub>2</sub>       | -0.530               | 0.93                                        |
| TiO <sub>2</sub> -Sn   | -0.577               | 1.18                                        |
| TiO <sub>2</sub> -F    | -0.515               | 0.90                                        |
| TiO <sub>2</sub> -Sn/F | -0.575               | 1.17                                        |

**Table S3** Photovoltaic characteristics of the DSSCs based on TiO<sub>2</sub> and the doped TiO<sub>2</sub> photoanodes.

| Samples                | Doping sources                                                     | $j_{sc}$ (mA cm <sup>-2</sup> ) | $V_{oc}$ (mV) | FF              | $\eta$ (%)      | Dye loading ( $\times 10^{-7}$ mol cm <sup>-2</sup> ) |
|------------------------|--------------------------------------------------------------------|---------------------------------|---------------|-----------------|-----------------|-------------------------------------------------------|
|                        | None                                                               | 14.82 $\pm$ 0.11                | 686 $\pm$ 7   | 0.71 $\pm$ 0.01 | 7.22 $\pm$ 0.10 | 1.14 $\pm$ 0.04                                       |
| TiO <sub>2</sub> -Ta   | (C <sub>4</sub> H <sub>9</sub> O) <sub>5</sub> Ta                  | 17.53 $\pm$ 0.10                | 667 $\pm$ 6   | 0.71 $\pm$ 0.01 | 8.30 $\pm$ 0.10 | 1.14 $\pm$ 0.05                                       |
| TiO <sub>2</sub> -Ta/F | (C <sub>4</sub> H <sub>9</sub> O) <sub>5</sub> Ta+TiF <sub>4</sub> | 17.92 $\pm$ 0.10                | 690 $\pm$ 6   | 0.71 $\pm$ 0.01 | 8.78 $\pm$ 0.12 | 1.10 $\pm$ 0.05                                       |
| TiO <sub>2</sub> -Nb   | (C <sub>4</sub> H <sub>9</sub> O) <sub>5</sub> Nb                  | 17.71 $\pm$ 0.12                | 668 $\pm$ 7   | 0.71 $\pm$ 0.00 | 8.40 $\pm$ 0.12 | 1.13 $\pm$ 0.05                                       |
| TiO <sub>2</sub> -Nb/F | (C <sub>4</sub> H <sub>9</sub> O) <sub>5</sub> Nb+TiF <sub>4</sub> | 18.28 $\pm$ 0.12                | 695 $\pm$ 7   | 0.71 $\pm$ 0.01 | 9.02 $\pm$ 0.11 | 1.16 $\pm$ 0.04                                       |
| TiO <sub>2</sub> -Sb   | (CH <sub>3</sub> CO <sub>2</sub> ) <sub>3</sub> Sb                 | 17.82 $\pm$ 0.11                | 670 $\pm$ 5   | 0.70 $\pm$ 0.02 | 8.36 $\pm$ 0.11 | 1.15 $\pm$ 0.03                                       |
| TiO <sub>2</sub> -Sb/F | (C <sub>4</sub> H <sub>9</sub> O) <sub>5</sub> Nb+TiF <sub>4</sub> | 18.05 $\pm$ 0.14                | 702 $\pm$ 7   | 0.70 $\pm$ 0.02 | 8.87 $\pm$ 0.15 | 1.12 $\pm$ 0.04                                       |
| TiO <sub>2</sub> -F    | TiF <sub>4</sub>                                                   | 16.67 $\pm$ 0.11                | 702 $\pm$ 5   | 0.71 $\pm$ 0.01 | 8.31 $\pm$ 0.11 | 1.16 $\pm$ 0.04                                       |

## References

1. Z. Tong, T. Peng, W. Sun, W. Liu, S. Guo and X. Z. Zhao, *J. Phys. Chem. C*, 2014, **118**, 16892-16895.
2. X. Zhang, F. Liu, Q. L. Huang, G. Zhou and Z. S. Wang, *J. Phys. Chem. C*, 2007, **115**, 12665-12671.
3. P. S. Archana, A. Gupta, M. M. Yusoff and R. Jose, *Phys. Chem. Chem. Phys.*, 2014, **16**, 7448-7454.
4. A. H. G. Niaki, A. M. Bakhshayesh and M. R. Mohammadi, *Sol. Energy*, 2014, **103**, 210-222.
5. Q. Liu, *Electrochim. Acta*, 2014, **129**, 459-462.
6. C. N. Zhang, S. Chen, L. e. Mo, Y. Huang, H. Tian, L. Hu, Z. Huo, F. Kong, S. Dai and X. Pan, *J. Phys. Chem. C*, 2011, 16418-16424.
7. H. Seo, Y. Wang, D. Ichida, G. Uchida, N. Itagaki, K. Koga, M. Shiratani, S. H. Nam and J. H. Boo, *Jpn. J. Appl. Phys.*, 2013, **52**, 11NM02.
8. J. Zhang, W. Q. Peng, Z. H. Chen, H. Chen and L. Y. Han, *J. Phys. Chem. C*, 2012, **116**, 19182-19190.
9. M. Wang, S. L. Bai, A. F. Chen, Y. D. Duan, Q. P. Liu, D. Q. Li and Y. Lin, *Electrochimica Acta*, 2012, **77**, 54-59.
10. S. G. So, K. Lee and P. Schmuki, *Phys. Status Solidi-R*, 2012, **6**, 169-171.
11. E. M. Jin, X. G. Zhao, J. Y. Park and H. B. Gu, *Nanoscale Res. Lett.*, 2012, **7**, 97.
12. F. Z. Huang, Q. Li, G. J. Thorogood, Y. B. Cheng and R. A. Caruso, *J. Mater. Chem.*, 2012, **22**,

- 17128-17132.
13. Y. Zhang, L. L. Wang, B. K. Liu, J. L. Zhai, H. M. Fan, D. J. Wang, Y. H. Lin and T. F. Xie, *Electrochimica Acta*, 2011, **56**, 6517-6523.
  14. K. P. Wang and H. Teng, *Phys. Chem. Chem. Phys.*, 2009, **11**, 9489-9496.
  15. R. Ghosh, Y. Hara, L. Aibabaei, K. Hanson, S. Rangan, R. Bartynski, T. J. Meyer and R. Lopez, *ACS Appl. Mater. Inter.*, 2012, **4**, 4566-4570.
  16. M. Yang, D. Kim, H. Jha, K. Lee, J. Paul and P. Schmuki, *Chem. Commun.*, 2011, **47**, 2032-2034.
  17. T. Nikolay, L. Larina, O. Shevaleevskiy and B. T. Ahn, *Energy Environ. Sci.*, 2011, **4**, 1480-1486.
  18. X. Lü, X. Mou, J. Wu, D. Zhang, L. Zhang, F. Huang, F. Xu and S. Huang, *Adv. Funct. Mater.*, 2010, **20**, 509-515.
  19. P. S. Archana, R. Jose, M. M. Yusoff and S. Ramakrishna, *Appl. Phys. Lett.*, 2011, **98**.
  20. A. K. Chandiran, F. d. r. Sauvage, M. Casas-Cabanas, P. Comte, S. M. Zakeeruddin and M. Graetzel, *J. Phys. Chem. C*, 2010, **114**, 15849-15856.
  21. J. H. Huang, P. Y. Hung, S. F. Hu and R. S. Liu, *J. Mater. Chem.*, 2010, **20**, 6505-6511.
  22. T. R. C. K. Wijayarathna, G. M. L. P. Aponso, Y. P. Y. P. Ariyasinghe, E. V. A. Premalal, G. K. R. Kumara and K. Tennakone, *Nanotechnology*, 2008, **19**, -.
  23. C. Kim, K. S. Kim, H. Y. Kim and Y. S. Han, *J. Mater. Chem.*, 2008, **18**, 5809-5814.
  24. M. Dürr, S. Rosselli, A. Yasuda and G. Nelles, *J. Phys. Chem. B*, 2006, **110**, 21899-21902.
  25. A. Subramanian and H. W. Wang, *Appl. Surf. Sci.*, 2012, **258**, 6479-6484.
  26. Q. Sun, J. Zhang, P. Q. Wang, J. Zheng, X. N. Zhang, Y. Z. Cui, J. W. Feng and Y. J. Zhu, *J. Renew Sustain Ener.*, 2012, **4**, 023104.
  27. L. Song, H. Bin Yang, X. Wang, S. Y. Khoo, C. C. Wong, X. W. Liu and C. M. Li, *ACS Appl. Mater. Inter.*, 2012, **4**, 3712-3717.
  28. Q. Q. Hou, Y. Z. Zheng, J. F. Chen, W. L. Zhou, J. Deng and X. Tao, *J. Mater. Chem.*, 2011, **21**, 3877-3883.
  29. W. Guo, Y. Shen, G. Boschloo, A. Hagfeldt and T. Ma, *Electrochim. Acta*, 2011, **56**, 4611-4617.
  30. T. Ma, M. Akiyama, E. Abe and I. Imai, *Nano lett.*, 2005, **5**, 2543-2547.
  31. J. Y. Park, K. H. Lee, B. S. Kim, C. S. Kim, S. E. Lee, K. Okuyama, H. D. Jang and T. O. Kim, *Rsc Adv.*, 2014, **4**, 9946-9952.
  32. J. Yu, Y. Yang, R. Fan, L. Li and X. Li, *J. Phys. Chem. C*, 2014, **118**, 8795-8802.

33. J. P. Correa Baena and A. G. Agrios, *J. Phys. Chem. C*, 2014, **118**, 17028-17035.
34. H. C. Pang, H. B. Yang, C. X. Guo and C. M. Li, *ACS Appl. Mater. Inter.*, 2012, **4**, 6261-6265.
35. Z. D. Li, Y. Zhou, T. Yu, J. G. Liu and Z. G. Zou, *Crystengcomm*, 2012, **14**, 6462-6468.
36. X. C. Dou, D. Sabba, N. Mathews, L. H. Wong, Y. M. Lam and S. Mhaisalkar, *Chem. Mater.*, 2011, **23**, 3938-3945.
37. Z. D. Li, Y. Zhou, J. C. Song, T. Yu, J. G. Liu and Z. G. Zou, *J. Mater. Chem. A*, 2013, **1**, 524-531.
38. J. X. Zhao, X. H. Lu, Y. Z. Zheng, S. Q. Bi, X. Tao, J. F. Chen and W. Zhou, *Electrochem. Commun.*, 2013, **32**, 14-17.
39. C. J. Raj, K. Prabakar, S. N. Karthick, K. V. Hemalatha, M.-K. Son and H. J. Kim, *J. Phys. Chem. C*, 2013, **117**, 2600-2607.
40. R. B. Tao, T. Tomita, R. A. Wong and K. Waki, *J. Power Sources*, 2012, **214**, 159-165.
41. S. Ameen, M. S. Akhtar, H. K. Seo, Y. S. Kim and H. S. Shin, *Chem. Eng. J.*, 2012, **187**, 351-356.
42. K. Mahmood and H. J. Sung, *J. Mater. Chem. A*, 2014, **2**, 5408-5417.
43. L. Y. Zhang, Y. L. Yang, R. Q. Fan, H. Y. Chen, R. K. Jia, Y. H. Wang, L. Q. Ma and Y. Z. Wang, *Mater. Sci. Eng. B-Adv.*, 2012, **177**, 956-961.
44. K. Mahmood, B. S. Swain, G. S. Han, B.-J. Kim and H. S. Jung, *ACS Appl. Mater. Inter.*, 2014, **6**, 10028-10043.
45. Y. Z. Zheng, X. Tao, Q. A. Hou, D. T. Wang, W. L. Zhou and J. F. Chen, *Chem. Mater.*, 2011, **23**, 3-5.
46. L. J. Luo, W. Tao, X. Y. Hu, T. Xiao, B. J. Heng, W. Huang, H. Wang, H. W. Han, Q. K. Jiang, J. B. Wang and Y. W. Tang, *J. Power Sources*, 2011, **196**, 10518-10525.
